# Supplementary material
Source: PubMed Central journal article supplement (PMC8179426)

**A**

| Nat-Nat vs Nat-SO | Nat-Nat vs SO-Nat | SO-Nat vs SO-SO | Nat-Nat vs. SO-SO | SO-Nat vs. Nat-SO |
|-------------------|-------------------|-----------------|-------------------|-------------------|
| ×                 | ×                 | <b>Ctss</b>     | <b>Ctss</b>       | ×                 |
| ×                 | ×                 | Lcn2            | ×                 | ×                 |
| ×                 | ×                 | Mmp12           | ×                 | Mmp12             |
| Phlda2            | ×                 | ×               | ×                 | ×                 |
| ×                 | Hdac9             | ×               | ×                 | ×                 |
| ×                 | Igfbp3            | ×               | ×                 | ×                 |
| ×                 | Naip5             | Naip5           | ×                 | Naip5             |
| ×                 | ×                 | Ifit3           | Ifit3             | ×                 |
| H2-Q6             | ×                 | H2-Q6           | H2-Q6             | H2-Q6             |
| ×                 | ×                 | Gm12250         | Gm12250           | ×                 |
| ×                 | ×                 | Tgtp1/2         | Tgtp1/2           | ×                 |

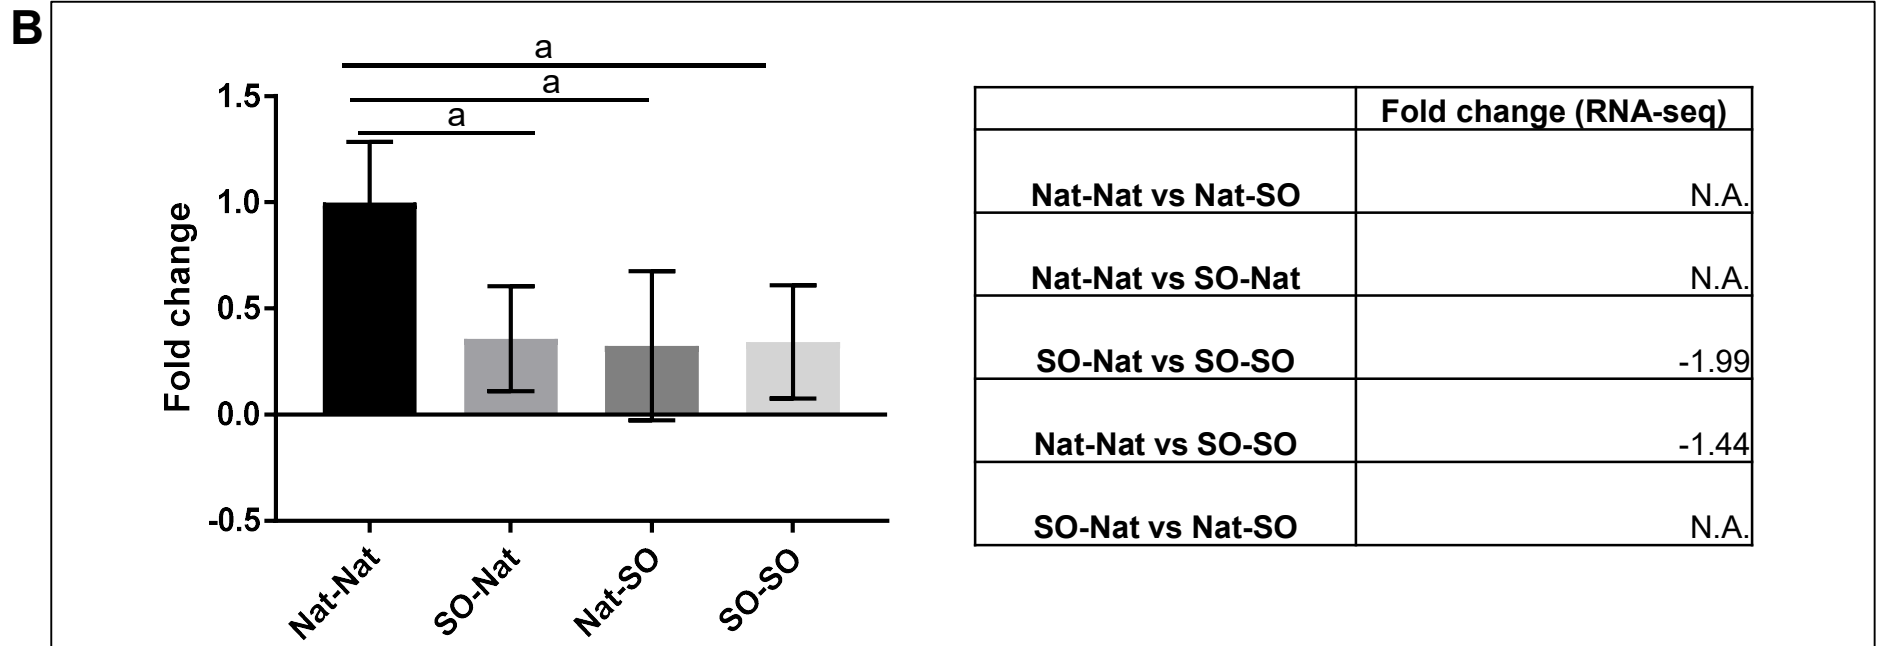

Supplement: supplementalfigure_s4_ioaa109.pdf [file supplementalfigure_s4_ioaa109.pdf]
