# Supplementary material
Source: PubMed Central journal article supplement (PMC8179426)
Supplement: supplementaltable_1_ioaa109.pdf [file supplementaltable_1_ioaa109.pdf]

| Gene                   | Direction               | <u>Sequence</u>                    |
|------------------------|-------------------------|------------------------------------|
| <i>H19/Igf2</i><br>ICR | Forward                 | 5'-GGGTAGGATATATGTATTTTTTAGGTTG-3' |
|                        | Biotinylated<br>Reverse | 5'-CTCATAAAACCCATAACTATAAAATCAT-3' |
| <i>Igf2</i> DMR 1      | Forward                 | 5'-TGAGGTTAGATTAGGTTGTAAGTT-3'     |
|                        | Biotinylated<br>Reverse | 5'-CTTCCCTACCCCTTAAACC-3'          |
| <i>Kcnqlot1</i>        | Forward                 | 5'-AGGTTTTGGTAGGTGGTTT-3'          |
|                        | Biotinylated<br>Reverse | 5'-CCTAACTAAACCAAATAACACCATCATA-3' |
| <i>Peg3</i> DMR        | Forward                 | 5'-GGTTTTTAAGGGTAATTGATAAGG-3'     |
|                        | Biotinylated<br>Reverse | 5'-CCCTATCACCTAAATAACATCCC-3'      |
