# Supplementary material
Source: PubMed Central journal article supplement (PMC8179426)
Supplement: supplementaltable_2_ioaa109.pdf [file supplementaltable_2_ioaa109.pdf]

|                                 | <b>Natural Recipients</b> |             | <b>Superovulated Recipients</b> |             | <b>p value</b> |
|---------------------------------|---------------------------|-------------|---------------------------------|-------------|----------------|
| <b>Transfers</b>                | 22                        |             | 21                              |             | N/A            |
| <b>Pregnancies, n (%)</b>       | 15 (68)                   |             | 8 (38)                          |             | 0.05           |
| <b>Implantation Rate, %</b>     | 27                        |             | 18                              |             | 0.24           |
| <b>Mean litter size (range)</b> | 2.5 (1-6)                 |             | 3.3 (1-6)                       |             | 0.29           |
|                                 | <b>GFP+</b>               | <b>GFP-</b> | <b>GFP+</b>                     | <b>GFP-</b> |                |
| <b>Implantation Rate, %</b>     | 15.5                      | 19.1        | 6.67                            | 22.2        | 0.17           |
