# Supplementary material
Source: PubMed Central journal article supplement (PMC8179426)
Supplement: supplementaltable_3_ioaa109.pdf [file supplementaltable_3_ioaa109.pdf]

| Nat-Nat vs Nat-SO |         | Nat-Nat vs SO-Nat |         | SO-Nat vs SO-SO |         | Nat-Nat vs SO-SO |         | SO-Nat vs Nat-SO |         |
|-------------------|---------|-------------------|---------|-----------------|---------|------------------|---------|------------------|---------|
| Genes             | log2 FC | Genes             | log2 FC | Genes           | log2 FC | Genes            | log2 FC | Genes            | log2 FC |
| Ankrd36           | -2.70   | Adamts11          | -1.25   | Adamdec1        | -4.97   | Abca13           | -2.34   | Adamts11         | 1.29    |
| Calm4             | 1.71    | Ankrd6            | -1.09   | Cdh23           | 1.02    | Anxa8            | -1.15   | Apoa4            | -1.71   |
| Casp1             | -1.13   | Ankrd66           | 1.21    | Ctss            | -1.99   | Apod             | -1.14   | Arg1             | -2.35   |
| Chst9             | -4.74   | Apold1            | -1.12   | Cygb            | 1.70    | Apof             | 3.16    | Ccdc38           | -2.14   |
| Col7a1            | -1.22   | Astn1             | 1.38    | Gdpd3           | -4.54   | C1qtnf3          | -1.13   | Ccl6             | -1.93   |
| Cxcl9             | -6.51   | Ccdc38            | 1.91    | Gm12250         | -2.18   | C3               | -1.43   | Ccl7             | -1.64   |
| Gm5514            | -3.48   | Ccr111            | 1.17    | Gm12751         | 1.64    | Cck              | -1.46   | Ccl9             | -1.68   |
| H2-Q6             | -1.49   | Chrna2            | 2.20    | Gm12784         | -1.71   | Cd274            | -1.55   | Fcgr3            | -1.34   |
| Krtdap            | 2.23    | Cpz               | -1.53   | H2-Q6           | -1.86   | Cd55             | -1.14   | Gm10704          | -3.00   |
| Phlda2            | -1.42   | Cygb              | -1.51   | Hba-x           | 4.10    | Chrna2           | 2.50    | Gm20400          | 1.88    |
| Pri2c1            | -1.24   | Egflam            | -1.16   | Hmgcs2          | 1.30    | Chst9            | -2.81   | H2-Q6            | -1.89   |
|                   |         | Fmod              | -1.17   | Ifit3           | -1.27   | Clec12b          | 1.03    | Hsd3b1           | -2.23   |
|                   |         | Frem1             | -2.06   | Isg15           | -1.14   | Col23a1          | -1.30   | Ifi2712b         | -1.29   |
|                   |         | Gm12784           | 2.15    | Kcnh6           | 2.34    | Cpne8            | -1.08   | Mmp12            | -1.49   |
|                   |         | Gm14165           | 2.97    | Lcn2            | -2.19   | Ctss             | -1.44   | Ms4a7            | -1.23   |
|                   |         | Gm7863            | 1.22    | Ltf             | -3.05   | Cxcl9            | -6.03   | Naip5            | -2.02   |
|                   |         | Gsg11             | 1.15    | Lyz2            | -1.56   | Cybb             | -1.09   | Naip6            | -2.00   |
|                   |         | Hdac9             | -1.19   | Mmp12           | -1.65   | Dao              | 1.61    | Pm20d1           | 1.28    |
|                   |         | Hist1h2al         | 1.52    | Naip5           | -1.47   | Ermap            | 1.05    | Pri3d1           | -1.94   |
|                   |         | Igfbp3            | -1.09   | Serpinb8        | -1.09   | Gbp10            | -1.31   | Slfm4            | -1.32   |
|                   |         | Kcnj13            | -1.19   | Slc29a4         | 2.04    | Gbp2             | -1.71   | Stra6l           | -2.02   |
|                   |         | Mfap2             | -1.02   | Spr2f           | -3.26   | Gbp3             | -1.09   | Syt12            | 1.20    |
|                   |         | Naip5             | 1.28    | Supt20-ps       | 1.33    | Gbp6             | -1.09   | Tph1             | -2.17   |
|                   |         | Nkain2            | -1.16   | Tgtp1           | -2.86   | Gdpd3            | -4.45   | Zmat4            | -1.01   |
|                   |         | Nnat              | -1.41   | Usp18           | -1.11   | Gipc2            | -1.04   |                  |         |
|                   |         | Olfr78            | -1.37   |                 |         | Glde             | -1.26   |                  |         |
|                   |         | Pri3d1            | 1.41    |                 |         | Gm12250          | -2.45   |                  |         |
|                   |         | Pri5a1            | 1.12    |                 |         | Gm14165          | 3.02    |                  |         |
|                   |         | Scn3b             | -1.84   |                 |         | Gm14642          | 1.16    |                  |         |
|                   |         | Spata21           | 1.18    |                 |         | Gm24715          | 1.45    |                  |         |
|                   |         | Srpx2             | -1.62   |                 |         | Gm26935          | 1.12    |                  |         |
|                   |         | Stra6l            | 1.48    |                 |         | Gm29084          | 2.61    |                  |         |
|                   |         | Syt13             | 1.18    |                 |         | Gm42743          | 1.03    |                  |         |
|                   |         | Tcf15             | -1.28   |                 |         | Gm5431           | -1.48   |                  |         |
|                   |         | Wscd1             | -1.01   |                 |         | Gm5829           | 1.75    |                  |         |
|                   |         | Zmat4             | 1.26    |                 |         | Gm7863           | 1.41    |                  |         |
|                   |         |                   |         |                 |         | Gm8615           | -3.16   |                  |         |
|                   |         |                   |         |                 |         | Gm8730           | 2.63    |                  |         |
|                   |         |                   |         |                 |         | Gpr176           | -1.62   |                  |         |
|                   |         |                   |         |                 |         | Gsg11            | 1.26    |                  |         |
|                   |         |                   |         |                 |         | H2-Aa            | -1.21   |                  |         |
|                   |         |                   |         |                 |         | H2-DMb1          | -1.99   |                  |         |
|                   |         |                   |         |                 |         | H2-Q6            | -1.48   |                  |         |
|                   |         |                   |         |                 |         | Hba-x            | 3.24    |                  |         |
|                   |         |                   |         |                 |         | Hbb-y            | 4.24    |                  |         |

|  |  |  |  |  |           |       |  |  |
|--|--|--|--|--|-----------|-------|--|--|
|  |  |  |  |  | Hist1h2a1 | 1.46  |  |  |
|  |  |  |  |  | Hopx      | 1.08  |  |  |
|  |  |  |  |  | Ifi202b   | -1.48 |  |  |
|  |  |  |  |  | Ifi203    | -1.06 |  |  |
|  |  |  |  |  | Ifi47     | -1.51 |  |  |
|  |  |  |  |  | Ifit1     | -1.08 |  |  |
|  |  |  |  |  | Ifit2     | -1.22 |  |  |
|  |  |  |  |  | Ifit3     | -1.49 |  |  |
|  |  |  |  |  | Ifne      | -1.80 |  |  |
|  |  |  |  |  | Igfbp6    | -1.39 |  |  |
|  |  |  |  |  | Igtp      | -1.66 |  |  |
|  |  |  |  |  | Il1rl1    | -1.65 |  |  |
|  |  |  |  |  | Il7r      | -1.29 |  |  |
|  |  |  |  |  | Ildr2     | -1.27 |  |  |
|  |  |  |  |  | Irgm1     | -1.26 |  |  |
|  |  |  |  |  | Irgm2     | -1.07 |  |  |
|  |  |  |  |  | Kcnh6     | 1.33  |  |  |
|  |  |  |  |  | Kcnn1     | -1.06 |  |  |
|  |  |  |  |  | Lgals4    | 1.61  |  |  |
|  |  |  |  |  | Ms4a4c    | -1.63 |  |  |
|  |  |  |  |  | Mt4       | 2.61  |  |  |
|  |  |  |  |  | Nrg1      | -1.46 |  |  |
|  |  |  |  |  | Olfml1    | -1.39 |  |  |
|  |  |  |  |  | Olfir224  | 2.98  |  |  |
|  |  |  |  |  | Pla2g4e   | 1.04  |  |  |
|  |  |  |  |  | Plac8     | 1.12  |  |  |
|  |  |  |  |  | Prl3c1    | 1.03  |  |  |
|  |  |  |  |  | Pr17a1    | 1.02  |  |  |
|  |  |  |  |  | Ptger2    | -1.42 |  |  |
|  |  |  |  |  | Rbp4      | -1.02 |  |  |
|  |  |  |  |  | Retnlg    | 1.74  |  |  |
|  |  |  |  |  | Rgl3      | 1.13  |  |  |
|  |  |  |  |  | Rps26-ps1 | -2.37 |  |  |
|  |  |  |  |  | Rxfp2     | -3.59 |  |  |
|  |  |  |  |  | Serpina3g | -1.39 |  |  |
|  |  |  |  |  | Serpinb8  | -1.50 |  |  |
|  |  |  |  |  | Slamf7    | -1.59 |  |  |
|  |  |  |  |  | Slc13a5   | -3.28 |  |  |
|  |  |  |  |  | Slc1a2    | -1.22 |  |  |
|  |  |  |  |  | Sostdc1   | -1.77 |  |  |
|  |  |  |  |  | Spata21   | 1.55  |  |  |
|  |  |  |  |  | Stat1     | -1.09 |  |  |
|  |  |  |  |  | Tdrd5     | 1.07  |  |  |
|  |  |  |  |  | Tgtp1     | -2.58 |  |  |
|  |  |  |  |  | Tgtp2     | -3.15 |  |  |
|  |  |  |  |  | Tmem117   | -1.70 |  |  |
|  |  |  |  |  | Wdr72     | -1.44 |  |  |

|  |  |  |  |  |      |       |  |  |
|--|--|--|--|--|------|-------|--|--|
|  |  |  |  |  | Zbp1 | -2.32 |  |  |
|--|--|--|--|--|------|-------|--|--|
