# Supplementary material
Source: PubMed Central journal article supplement (PMC8179426)
Supplement: supplementaltable_4_ioaa109.pdf [file supplementaltable_4_ioaa109.pdf]

TRUE = Present in pairwise comparison, FALSE = absent in pairwise comparison

|           | Nat-Nat vs Nat-SO | Nat-Nat vs SO-Nat | SO-Nat vs SO-SO | Nat-Nat vs. SO-SO | SO-Nat vs. Nat-SO | Count |
|-----------|-------------------|-------------------|-----------------|-------------------|-------------------|-------|
| H2-Q6     | TRUE              | FALSE             | TRUE            | TRUE              | TRUE              | 4     |
| Naip5     | FALSE             | TRUE              | TRUE            | FALSE             | TRUE              | 3     |
| Chst9     | TRUE              | FALSE             | FALSE           | TRUE              | FALSE             | 2     |
| Cxcl9     | TRUE              | FALSE             | FALSE           | TRUE              | FALSE             | 2     |
| Adamts1   | FALSE             | TRUE              | FALSE           | FALSE             | TRUE              | 2     |
| Ccdc38    | FALSE             | TRUE              | FALSE           | FALSE             | TRUE              | 2     |
| Chrna2    | FALSE             | TRUE              | FALSE           | TRUE              | FALSE             | 2     |
| Cygb      | FALSE             | TRUE              | TRUE            | FALSE             | FALSE             | 2     |
| Gm12784   | FALSE             | TRUE              | TRUE            | FALSE             | FALSE             | 2     |
| Gm14165   | FALSE             | TRUE              | FALSE           | TRUE              | FALSE             | 2     |
| Gm7863    | FALSE             | TRUE              | FALSE           | TRUE              | FALSE             | 2     |
| Gsg1l     | FALSE             | TRUE              | FALSE           | TRUE              | FALSE             | 2     |
| Hist1h2al | FALSE             | TRUE              | FALSE           | TRUE              | FALSE             | 2     |
| Prl3d1    | FALSE             | TRUE              | FALSE           | FALSE             | TRUE              | 2     |
| Spata21   | FALSE             | TRUE              | FALSE           | TRUE              | FALSE             | 2     |
| Stra6l    | FALSE             | TRUE              | FALSE           | FALSE             | TRUE              | 2     |
| Zmat4     | FALSE             | TRUE              | FALSE           | FALSE             | TRUE              | 2     |
| Ctss      | FALSE             | FALSE             | TRUE            | TRUE              | FALSE             | 2     |
| Gdpd3     | FALSE             | FALSE             | TRUE            | TRUE              | FALSE             | 2     |
| Gm12250   | FALSE             | FALSE             | TRUE            | TRUE              | FALSE             | 2     |
| Hba-x     | FALSE             | FALSE             | TRUE            | TRUE              | FALSE             | 2     |
| Ifit3     | FALSE             | FALSE             | TRUE            | TRUE              | FALSE             | 2     |
| Kcnh6     | FALSE             | FALSE             | TRUE            | TRUE              | FALSE             | 2     |
| Mmp12     | FALSE             | FALSE             | TRUE            | FALSE             | TRUE              | 2     |
| Serpinb8  | FALSE             | FALSE             | TRUE            | TRUE              | FALSE             | 2     |
| Tgtp1     | FALSE             | FALSE             | TRUE            | TRUE              | FALSE             | 2     |
| Ankrd36   | TRUE              | FALSE             | FALSE           | FALSE             | FALSE             | 1     |
| Calm4     | TRUE              | FALSE             | FALSE           | FALSE             | FALSE             | 1     |
| Casp1     | TRUE              | FALSE             | FALSE           | FALSE             | FALSE             | 1     |
| Col7a1    | TRUE              | FALSE             | FALSE           | FALSE             | FALSE             | 1     |
| Gm5514    | TRUE              | FALSE             | FALSE           | FALSE             | FALSE             | 1     |
| Krtdap    | TRUE              | FALSE             | FALSE           | FALSE             | FALSE             | 1     |
| Phlda2    | TRUE              | FALSE             | FALSE           | FALSE             | FALSE             | 1     |
| Prl2c1    | TRUE              | FALSE             | FALSE           | FALSE             | FALSE             | 1     |
| Ankrd6    | FALSE             | TRUE              | FALSE           | FALSE             | FALSE             | 1     |

|                      |       |       |       |       |       |   |
|----------------------|-------|-------|-------|-------|-------|---|
| <b>Ankrd66</b>       | FALSE | TRUE  | FALSE | FALSE | FALSE | 1 |
| <b>Apold1</b>        | FALSE | TRUE  | FALSE | FALSE | FALSE | 1 |
| <b>Astn1</b>         | FALSE | TRUE  | FALSE | FALSE | FALSE | 1 |
| <b>Ccr1l1</b>        | FALSE | TRUE  | FALSE | FALSE | FALSE | 1 |
| <b>Cpz</b>           | FALSE | TRUE  | FALSE | FALSE | FALSE | 1 |
| <b>Egflam</b>        | FALSE | TRUE  | FALSE | FALSE | FALSE | 1 |
| <b>Fmod</b>          | FALSE | TRUE  | FALSE | FALSE | FALSE | 1 |
| <b>Frem1</b>         | FALSE | TRUE  | FALSE | FALSE | FALSE | 1 |
| <b>Hdac9</b>         | FALSE | TRUE  | FALSE | FALSE | FALSE | 1 |
| <b>Igfbp3</b>        | FALSE | TRUE  | FALSE | FALSE | FALSE | 1 |
| <b>Kcnj13</b>        | FALSE | TRUE  | FALSE | FALSE | FALSE | 1 |
| <b>Mfap2</b>         | FALSE | TRUE  | FALSE | FALSE | FALSE | 1 |
| <b>Nkain2</b>        | FALSE | TRUE  | FALSE | FALSE | FALSE | 1 |
| <b>Nnat</b>          | FALSE | TRUE  | FALSE | FALSE | FALSE | 1 |
| <b>Olf78</b>         | FALSE | TRUE  | FALSE | FALSE | FALSE | 1 |
| <b>Prl5a1</b>        | FALSE | TRUE  | FALSE | FALSE | FALSE | 1 |
| <b>Scn3b</b>         | FALSE | TRUE  | FALSE | FALSE | FALSE | 1 |
| <b>Srpx2</b>         | FALSE | TRUE  | FALSE | FALSE | FALSE | 1 |
| <b>Syt13</b>         | FALSE | TRUE  | FALSE | FALSE | FALSE | 1 |
| <b>Tcf15</b>         | FALSE | TRUE  | FALSE | FALSE | FALSE | 1 |
| <b>Wscd1</b>         | FALSE | TRUE  | FALSE | FALSE | FALSE | 1 |
| <b>Adamdec1</b>      | FALSE | FALSE | TRUE  | FALSE | FALSE | 1 |
| <b>B230312C02Rik</b> | FALSE | FALSE | TRUE  | FALSE | FALSE | 1 |
| <b>BC018473</b>      | FALSE | FALSE | TRUE  | FALSE | FALSE | 1 |
| <b>Cdh23</b>         | FALSE | FALSE | TRUE  | FALSE | FALSE | 1 |
| <b>Gm12751</b>       | FALSE | FALSE | TRUE  | FALSE | FALSE | 1 |
| <b>Hmgcs2</b>        | FALSE | FALSE | TRUE  | FALSE | FALSE | 1 |
| <b>Isg15</b>         | FALSE | FALSE | TRUE  | FALSE | FALSE | 1 |
| <b>Lcn2</b>          | FALSE | FALSE | TRUE  | FALSE | FALSE | 1 |
| <b>Ltf</b>           | FALSE | FALSE | TRUE  | FALSE | FALSE | 1 |
| <b>Lyz2</b>          | FALSE | FALSE | TRUE  | FALSE | FALSE | 1 |
| <b>Slc29a4</b>       | FALSE | FALSE | TRUE  | FALSE | FALSE | 1 |
| <b>Spr2f</b>         | FALSE | FALSE | TRUE  | FALSE | FALSE | 1 |
| <b>Supt20-ps</b>     | FALSE | FALSE | TRUE  | FALSE | FALSE | 1 |
| <b>Usp18</b>         | FALSE | FALSE | TRUE  | FALSE | FALSE | 1 |
| <b>Abca13</b>        | FALSE | FALSE | FALSE | TRUE  | FALSE | 1 |
| <b>Anxa8</b>         | FALSE | FALSE | FALSE | TRUE  | FALSE | 1 |
| <b>Apod</b>          | FALSE | FALSE | FALSE | TRUE  | FALSE | 1 |
| <b>Apof</b>          | FALSE | FALSE | FALSE | TRUE  | FALSE | 1 |
| <b>BC023105</b>      | FALSE | FALSE | FALSE | TRUE  | FALSE | 1 |
| <b>C1qtnf3</b>       | FALSE | FALSE | FALSE | TRUE  | FALSE | 1 |

|                           |       |       |       |      |       |   |
|---------------------------|-------|-------|-------|------|-------|---|
| <b>C3</b>                 | FALSE | FALSE | FALSE | TRUE | FALSE | 1 |
| <b>Cck</b>                | FALSE | FALSE | FALSE | TRUE | FALSE | 1 |
| <b>Cd274</b>              | FALSE | FALSE | FALSE | TRUE | FALSE | 1 |
| <b>Cd55</b>               | FALSE | FALSE | FALSE | TRUE | FALSE | 1 |
| <b>Clec12b</b>            | FALSE | FALSE | FALSE | TRUE | FALSE | 1 |
| <b>Col23a1</b>            | FALSE | FALSE | FALSE | TRUE | FALSE | 1 |
| <b>Cpne8</b>              | FALSE | FALSE | FALSE | TRUE | FALSE | 1 |
| <b>Cybb</b>               | FALSE | FALSE | FALSE | TRUE | FALSE | 1 |
| <b>Dao</b>                | FALSE | FALSE | FALSE | TRUE | FALSE | 1 |
| <b>Ermap</b>              | FALSE | FALSE | FALSE | TRUE | FALSE | 1 |
| <b>F830016B0<br/>8Rik</b> | FALSE | FALSE | FALSE | TRUE | FALSE | 1 |
| <b>Gbp10</b>              | FALSE | FALSE | FALSE | TRUE | FALSE | 1 |
| <b>Gbp2</b>               | FALSE | FALSE | FALSE | TRUE | FALSE | 1 |
| <b>Gbp3</b>               | FALSE | FALSE | FALSE | TRUE | FALSE | 1 |
| <b>Gbp6</b>               | FALSE | FALSE | FALSE | TRUE | FALSE | 1 |
| <b>Gipc2</b>              | FALSE | FALSE | FALSE | TRUE | FALSE | 1 |
| <b>Gldc</b>               | FALSE | FALSE | FALSE | TRUE | FALSE | 1 |
| <b>Gm14642</b>            | FALSE | FALSE | FALSE | TRUE | FALSE | 1 |
| <b>Gm24715</b>            | FALSE | FALSE | FALSE | TRUE | FALSE | 1 |
| <b>Gm26935</b>            | FALSE | FALSE | FALSE | TRUE | FALSE | 1 |
| <b>Gm29084</b>            | FALSE | FALSE | FALSE | TRUE | FALSE | 1 |
| <b>Gm42743</b>            | FALSE | FALSE | FALSE | TRUE | FALSE | 1 |
| <b>Gm5431</b>             | FALSE | FALSE | FALSE | TRUE | FALSE | 1 |
| <b>Gm5829</b>             | FALSE | FALSE | FALSE | TRUE | FALSE | 1 |
| <b>Gm8615</b>             | FALSE | FALSE | FALSE | TRUE | FALSE | 1 |
| <b>Gm8730</b>             | FALSE | FALSE | FALSE | TRUE | FALSE | 1 |
| <b>Gpr176</b>             | FALSE | FALSE | FALSE | TRUE | FALSE | 1 |
| <b>H2-Aa</b>              | FALSE | FALSE | FALSE | TRUE | FALSE | 1 |
| <b>H2-DMb1</b>            | FALSE | FALSE | FALSE | TRUE | FALSE | 1 |
| <b>Hbb-y</b>              | FALSE | FALSE | FALSE | TRUE | FALSE | 1 |
| <b>Hopx</b>               | FALSE | FALSE | FALSE | TRUE | FALSE | 1 |
| <b>Ifi202b</b>            | FALSE | FALSE | FALSE | TRUE | FALSE | 1 |
| <b>Ifi203</b>             | FALSE | FALSE | FALSE | TRUE | FALSE | 1 |
| <b>Ifi47</b>              | FALSE | FALSE | FALSE | TRUE | FALSE | 1 |
| <b>Ifit1</b>              | FALSE | FALSE | FALSE | TRUE | FALSE | 1 |
| <b>Ifit2</b>              | FALSE | FALSE | FALSE | TRUE | FALSE | 1 |
| <b>Ifne</b>               | FALSE | FALSE | FALSE | TRUE | FALSE | 1 |
| <b>Igfbp6</b>             | FALSE | FALSE | FALSE | TRUE | FALSE | 1 |
| <b>Igtp</b>               | FALSE | FALSE | FALSE | TRUE | FALSE | 1 |
| <b>Il1r1</b>              | FALSE | FALSE | FALSE | TRUE | FALSE | 1 |
| <b>Il7r</b>               | FALSE | FALSE | FALSE | TRUE | FALSE | 1 |

|                  |       |       |       |       |       |   |
|------------------|-------|-------|-------|-------|-------|---|
| <b>Ildr2</b>     | FALSE | FALSE | FALSE | TRUE  | FALSE | 1 |
| <b>Irgm1</b>     | FALSE | FALSE | FALSE | TRUE  | FALSE | 1 |
| <b>Irgm2</b>     | FALSE | FALSE | FALSE | TRUE  | FALSE | 1 |
| <b>Kcnn1</b>     | FALSE | FALSE | FALSE | TRUE  | FALSE | 1 |
| <b>Lgals4</b>    | FALSE | FALSE | FALSE | TRUE  | FALSE | 1 |
| <b>Ms4a4c</b>    | FALSE | FALSE | FALSE | TRUE  | FALSE | 1 |
| <b>Mt4</b>       | FALSE | FALSE | FALSE | TRUE  | FALSE | 1 |
| <b>Nrg1</b>      | FALSE | FALSE | FALSE | TRUE  | FALSE | 1 |
| <b>Olfml1</b>    | FALSE | FALSE | FALSE | TRUE  | FALSE | 1 |
| <b>Olf224</b>    | FALSE | FALSE | FALSE | TRUE  | FALSE | 1 |
| <b>Pla2g4e</b>   | FALSE | FALSE | FALSE | TRUE  | FALSE | 1 |
| <b>Plac8</b>     | FALSE | FALSE | FALSE | TRUE  | FALSE | 1 |
| <b>Prl3c1</b>    | FALSE | FALSE | FALSE | TRUE  | FALSE | 1 |
| <b>Prl7a1</b>    | FALSE | FALSE | FALSE | TRUE  | FALSE | 1 |
| <b>Ptger2</b>    | FALSE | FALSE | FALSE | TRUE  | FALSE | 1 |
| <b>Rbp4</b>      | FALSE | FALSE | FALSE | TRUE  | FALSE | 1 |
| <b>Retnlg</b>    | FALSE | FALSE | FALSE | TRUE  | FALSE | 1 |
| <b>Rgl3</b>      | FALSE | FALSE | FALSE | TRUE  | FALSE | 1 |
| <b>Rps26-ps1</b> | FALSE | FALSE | FALSE | TRUE  | FALSE | 1 |
| <b>Rxfp2</b>     | FALSE | FALSE | FALSE | TRUE  | FALSE | 1 |
| <b>Serpina3g</b> | FALSE | FALSE | FALSE | TRUE  | FALSE | 1 |
| <b>Slamf7</b>    | FALSE | FALSE | FALSE | TRUE  | FALSE | 1 |
| <b>Slc13a5</b>   | FALSE | FALSE | FALSE | TRUE  | FALSE | 1 |
| <b>Slc1a2</b>    | FALSE | FALSE | FALSE | TRUE  | FALSE | 1 |
| <b>Sostdc1</b>   | FALSE | FALSE | FALSE | TRUE  | FALSE | 1 |
| <b>Stat1</b>     | FALSE | FALSE | FALSE | TRUE  | FALSE | 1 |
| <b>Tdrd5</b>     | FALSE | FALSE | FALSE | TRUE  | FALSE | 1 |
| <b>Tgtp2</b>     | FALSE | FALSE | FALSE | TRUE  | FALSE | 1 |
| <b>Tmem117</b>   | FALSE | FALSE | FALSE | TRUE  | FALSE | 1 |
| <b>Wdr72</b>     | FALSE | FALSE | FALSE | TRUE  | FALSE | 1 |
| <b>Zbp1</b>      | FALSE | FALSE | FALSE | TRUE  | FALSE | 1 |
| <b>Apoa4</b>     | FALSE | FALSE | FALSE | FALSE | TRUE  | 1 |
| <b>Arg1</b>      | FALSE | FALSE | FALSE | FALSE | TRUE  | 1 |
| <b>Ccl6</b>      | FALSE | FALSE | FALSE | FALSE | TRUE  | 1 |
| <b>Ccl7</b>      | FALSE | FALSE | FALSE | FALSE | TRUE  | 1 |
| <b>Ccl9</b>      | FALSE | FALSE | FALSE | FALSE | TRUE  | 1 |
| <b>Fcgr3</b>     | FALSE | FALSE | FALSE | FALSE | TRUE  | 1 |
| <b>Gm10704</b>   | FALSE | FALSE | FALSE | FALSE | TRUE  | 1 |
| <b>Gm20400</b>   | FALSE | FALSE | FALSE | FALSE | TRUE  | 1 |
| <b>Hsd3b1</b>    | FALSE | FALSE | FALSE | FALSE | TRUE  | 1 |
| <b>Ifi2712b</b>  | FALSE | FALSE | FALSE | FALSE | TRUE  | 1 |

|               |       |       |       |       |      |   |
|---------------|-------|-------|-------|-------|------|---|
| <b>Ms4a7</b>  | FALSE | FALSE | FALSE | FALSE | TRUE | 1 |
| <b>Naip6</b>  | FALSE | FALSE | FALSE | FALSE | TRUE | 1 |
| <b>Pm20d1</b> | FALSE | FALSE | FALSE | FALSE | TRUE | 1 |
| <b>Sifn4</b>  | FALSE | FALSE | FALSE | FALSE | TRUE | 1 |
| <b>Sytl2</b>  | FALSE | FALSE | FALSE | FALSE | TRUE | 1 |
| <b>Tph1</b>   | FALSE | FALSE | FALSE | FALSE | TRUE | 1 |
