# Supplementary material
Source: PubMed Central journal article supplement (PMC8179426)

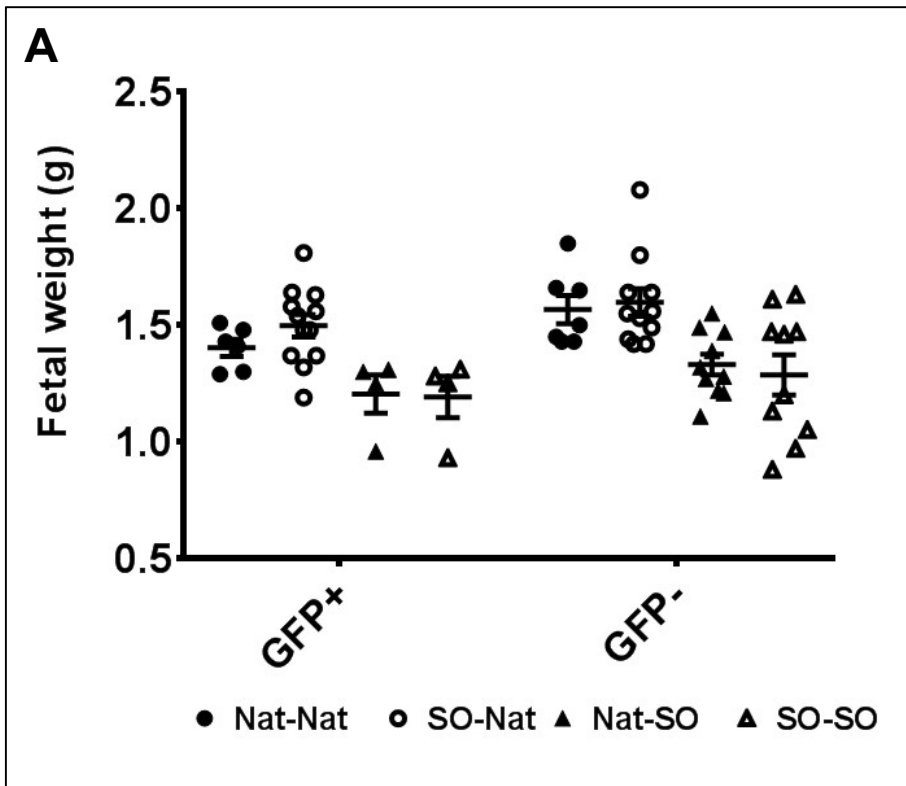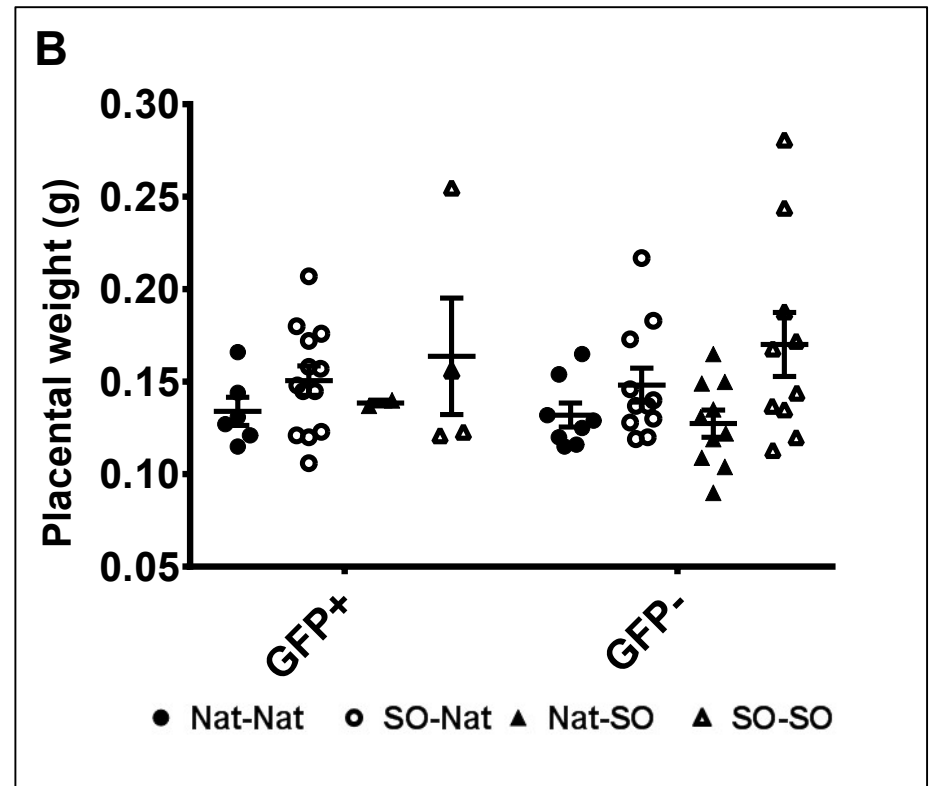

Supplement: supplementalfigure_s1_ioaa109.pdf [file supplementalfigure_s1_ioaa109.pdf]

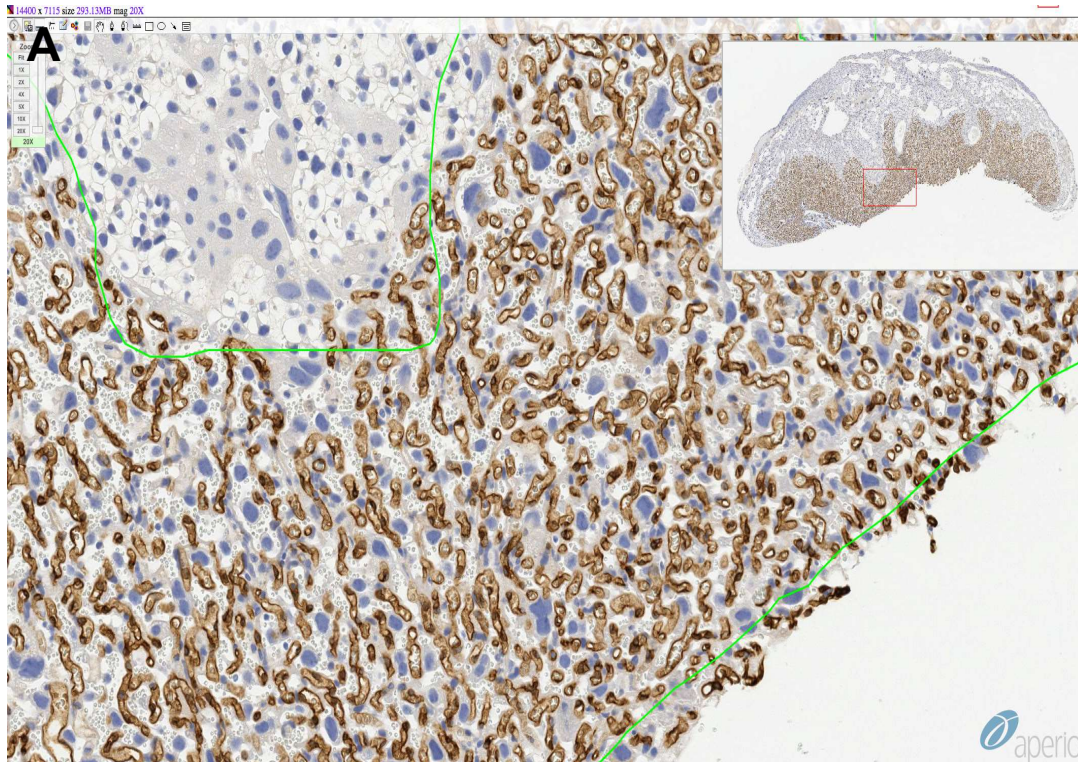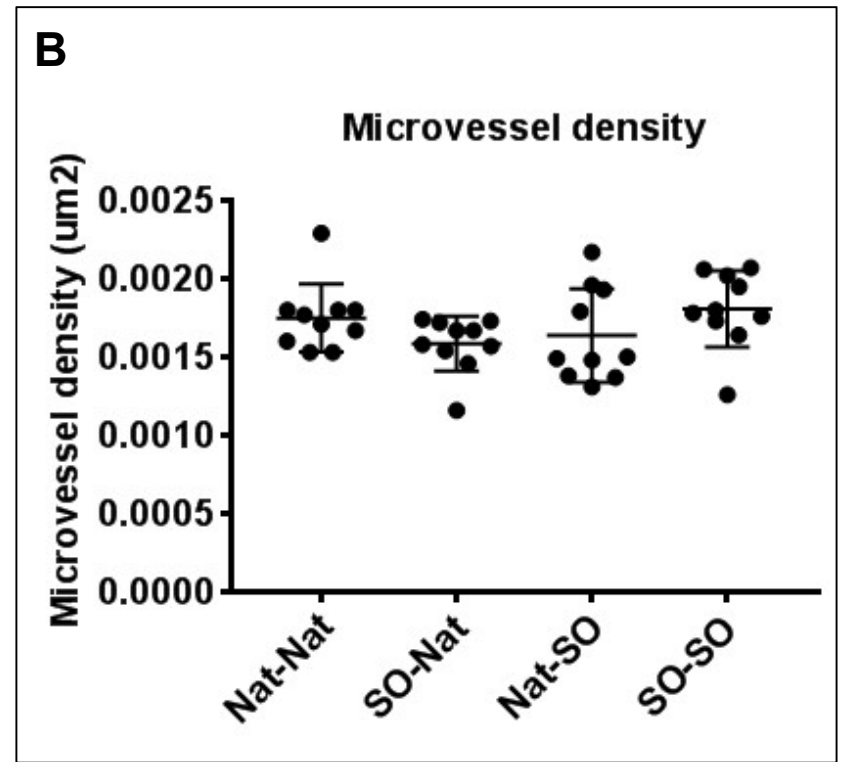

Supplement: supplementalfigure_s3_ioaa109.pdf [file supplementalfigure_s3_ioaa109.pdf]
